# Supplementary material for: Morphology and composition control of manganese oxide by the pulse reverse electrodeposition technique for high performance supercapacitors
Source: Royal Society of Chemistry journal article supplement (doi:10.1039/c3ta12828h), 2013-01-01
Supplement: c3ta12828h.pdf [file c3ta12828h.pdf]

Cite this: DOI: 10.1039/c0xx00000x

www.rsc.org/xxxxxx

ARTICLE TYPE

## Morphology and composition control of manganese oxide by pulse reverse electrodeposition technique for high performance supercapacitor

Sang Ha Lee<sup>a</sup>, Hyuck Lee<sup>a</sup>, Mi Suk Cho<sup>a</sup>, Jae-Do Nam<sup>b</sup> and Youngkwan Lee<sup>\*a</sup>

<sup>a</sup> School of chemical Engineering, Sungkyunkwan University, Suwon, Republic of Korea. Fax: +82 31 299 4711; Tel: +82 31 290 7326; E-mail: yklee@skku.edu

<sup>b</sup> Department of Polymer Science & Engineering, Sungkyunkwan University, Suwon, Republic of Korea. Fax: +82 31 292 8790; Tel: +82 31 290 7285; E-mail: jdnam@skku.edu

10

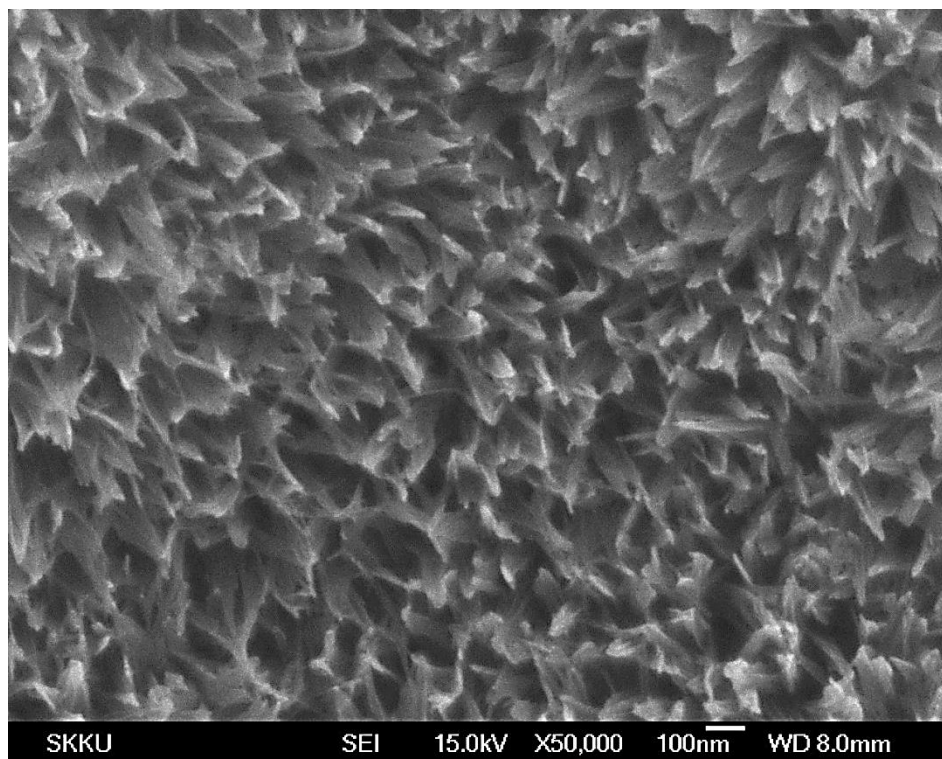

Fig. S1 SEM images of MnOx synthesized under PRP on graphite substrate

15

Cite this: DOI: 10.1039/c0xx00000x

www.rsc.org/xxxxxx

ARTICLE TYPE

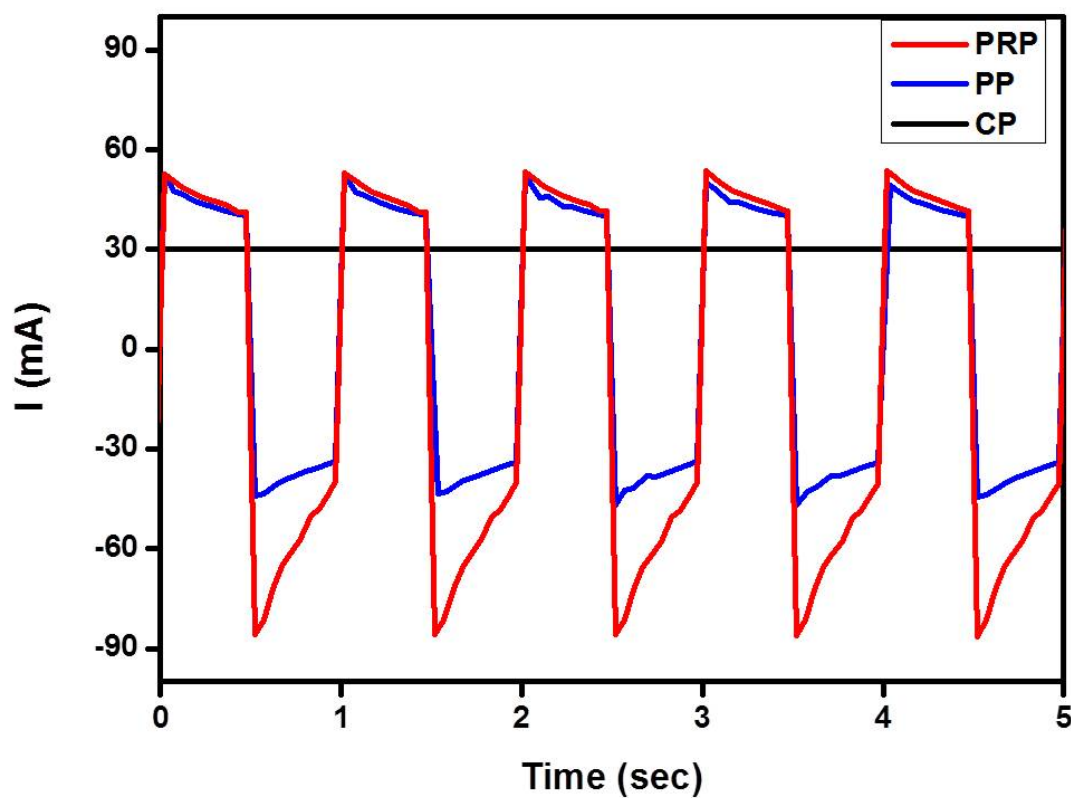

Fig. S2 Current variation during electrodeposition of manganese oxide by CP, PP, and PRP

Cite this: DOI: 10.1039/c0xx00000x

www.rsc.org/xxxxxx

ARTICLE TYPE

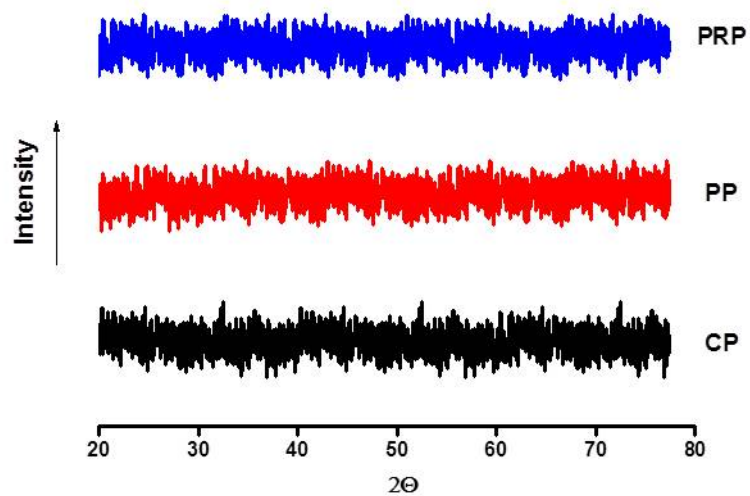

Fig. S3. XRD pattern of manganese oxide prepared by CP, PP and PRP

5

10

15

20

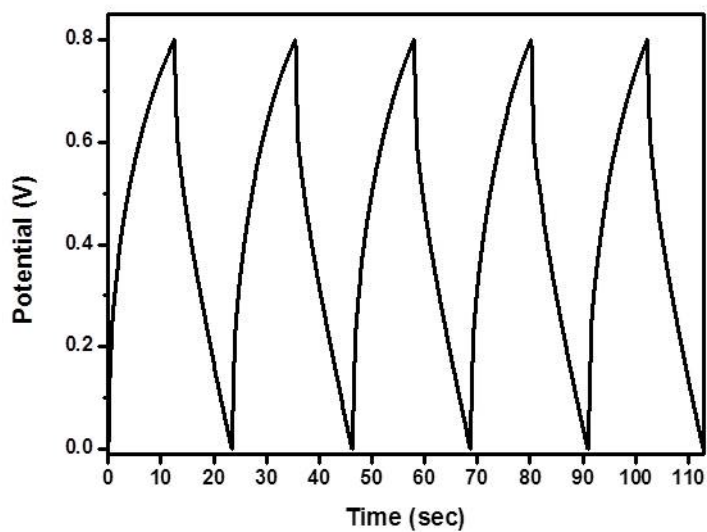

5 **Fig. S4.** Charge/discharge curves of symmetric capacitor with  $\text{Mn}_2\text{O}_3$  electrode prepared by PRP at  $10 \text{ Ag}^{-1}$

10
